# Supplementary material
Source: Copernicus journal article supplement (doi:10.5194/nhess-26-2817-2026)
Supplement: Supplementary file 1 [file nhess-26-2817-2026-supplement.pdf]

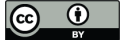

*Supplement of*

## **Unravelling wind-driven impact of storm clusters, a case study for the insurer Generali France**

**Laura Hasbini et al.**

*Correspondence to:* Laura Hasbini ([laura.hasbini@lscce.ipsl.fr](mailto:laura.hasbini@lscce.ipsl.fr))

The copyright of individual parts of the supplement might differ from the article licence.

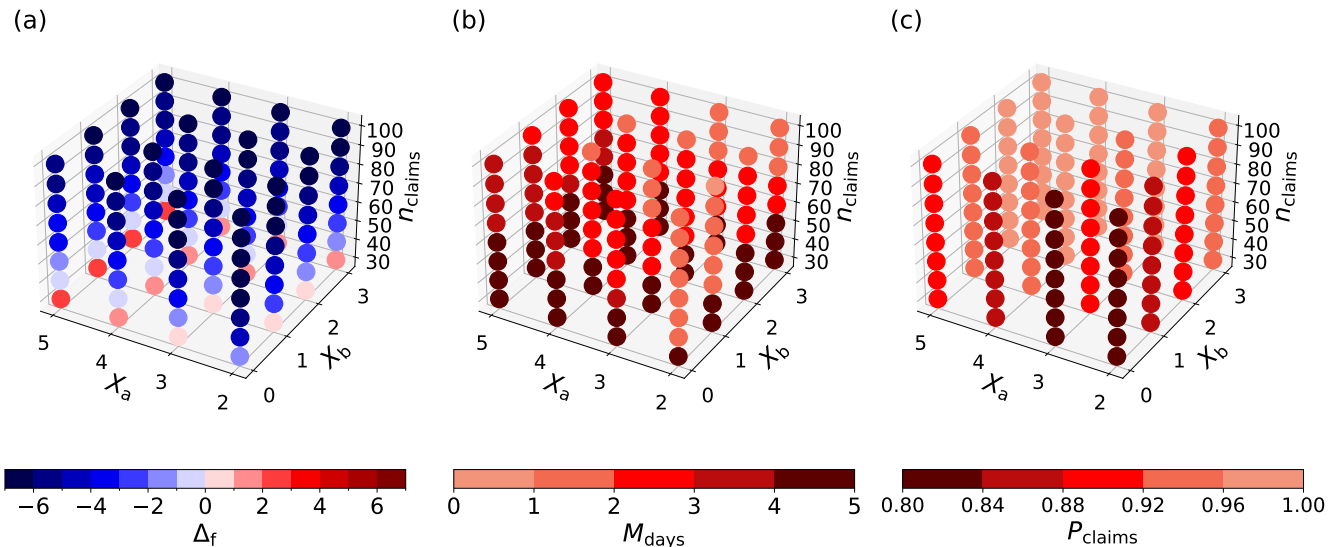

**Figure S1.** Frequency ( $\Delta_f$ ) in number of events (a), precision ( $M_{\text{days}}$ ) in number of days (b) and completeness ( $P_{\text{claims}}$ ) in percent (c) as a function of  $X_a$  (horizontal  $x$ ),  $X_b$  (horizontal  $y$ ) and  $n_{\text{claims}}$  (vertical  $z$ ). The optimal set of parameters ( $X_a, X_b, n_{\text{claims}}$ ) is obtained when the difference is null.

### S1 Sensitivity to tuning parameters

This subsection inspects the evolution of the performance metrics ( $M_{\text{days}}$ ,  $\Delta_f$  and  $P_{\text{claims}}$ ) as a function of the tuning parameters ( $X_b, X_a, n_{\text{claims}}$ ). The performance metrics are computed independently for each winter and for  $X_b$  in  $\{0, 1, 2, 3\}$ ,  $X_a$  in  $\{2, 3, 4, 5\}$  and  $n_{\text{claims}}$  between 30 and 100 with 10 claims steps. The metrics are then averaged over all the winters. Figure 5 S1 shows the variation of the frequency, precision and completeness metrics as a function of the tuning parameters. Lighter colours indicate better results in all the subfigures.

The impact of the association windows can first be evaluated. When  $X_a$  is too large, the precision decreases, as shown by the increased minimal difference between storm date and the nearest local maxima date (Fig. S1b). This indicates a degradation of the temporal alignment between identified storms and peaks in the claim time series. Conversely, increasing  $X_a$  enables the capture of more claims, thus being more representative of the global dataset (Fig. S1c). In terms of performance, this improves the completeness metric. Nonetheless, we see that the variation in the completeness varies less than the precision metric. The behaviour of  $X_b$  is similar to that of  $X_a$ , as it also enlarges the temporal window around  $d_{\text{storm}}$  within which claims are accepted. A greater value would allow for more completeness, but would also decrease the precision of the association. In contrast, the parameter  $n_{\text{claims}}$  does not alter the completeness performances. This parameter defines the threshold under which claims should be shifted; it thus does not influence the number of claims associated with storms. Regarding precision (Fig. S1b), shifting claims reduces the maximal difference between storm dates and the nearest peaks, suggesting that the adjusted claims

are primarily those furthest from the peak dates. This confirms that Step 3 of the association method (Sec.??) improves the temporal alignment between storms and local maxima in claim counts.

The behaviour of the frequency metric is more complex as it depends on the interaction of the three parameters (Fig. S1a). For a given temporal window ( $X_a$  and  $X_b$  fixed), increasing the minimal number of claims ( $n_{\text{claims}}$ ) reduces the number of storms associated with claims and consequently decreases the  $\Delta_f$ . This reduction is needed when a positive frequency is observed, i.e. when more storms are detected than local maxima in the claim time series. However, decreasing  $n_{\text{claims}}$  excessively leads to a negative  $\Delta_f$ , corresponding to an over-concentration of claims around the major storm events, with more local maxima than the number of storms. The situation when too many storms are captured (positive  $\Delta_f$ ) is mostly observed when  $n_{\text{claims}}$  is small.

A trade-off should be found between the width of the association windows ( $X_a$  and  $X_b$ ) and the strength of the concentration over the major events ( $n_{\text{claims}}$ ). The optimal association should not only be complete but also correctly attribute claims to the relevant storms. Fig. S1c shows that the smallest percentage of claims that can be linked to storm events is 80%. As this is already satisfactory, the optimisation therefore focuses on frequency consistency and temporal alignment between storm dates and local maxima.

The optimal tuning parameters  $X_b$ ,  $X_a$  and  $n_{\text{claims}}$  are obtained by minimizing the cost function defined as :

$$f_{\text{cost}}(w_{\text{freq}}) = \sqrt{w_{\text{freq}} \times \Delta_f^2 + (1 - w_{\text{freq}}) \times M_{\text{days}}^2}. \quad (\text{S1})$$

The frequency and precision metrics are normalized between 0 and 1,  $w_{\text{freq}}$  is a weight attributed to the frequency metric, which can vary between 0 and 1. This weight is used to quantify the sensitivity of the optimal parameters found. Optimisation is performed over  $f_{\text{cost}}$  using global minimization search for  $(X_a, X_b, N_{\text{min\_claims}}) \in \{0, 3\} \times \{2, 5\} \times \{30, 100\}$ . The robustness of the results to  $w_{\text{freq}}$  is discussed in Sect. 2.

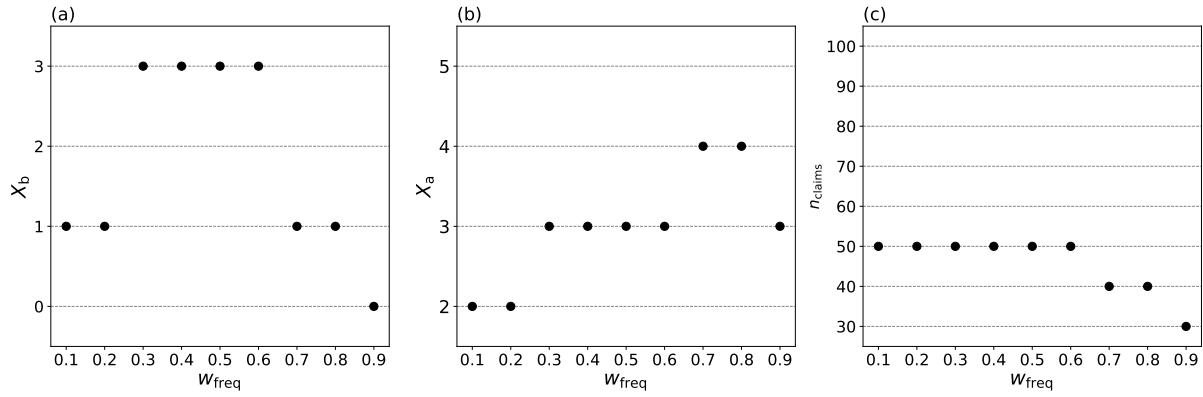

**Figure S2.** Optimal value of  $X_b$  (a),  $X_a$  (b) and  $n_{claims}$  (c) as a function of the weight of the frequency metric  $w_{freq}$

### S2 Sensitivity to cost function

The cost function  $f_{cost}$  defined in Sect.1 varies as a function of the weight assigned to the frequency metric ( $w_{freq}$ ). Fig. S2 shows the optimal values of the parameters  $X_b$ ,  $X_a$  and  $n_{claims}$  as a function of the varying weight. It can be underlined that the optimal values of all the parameters are identical for the weight varying between 0.3 and 0.6. This means that, with a balanced penalty between the precision and frequency metrics, the optimal parameters are identical.
